# Supplementary material
Source: PubMed Central journal article supplement (PMC3926056)
Supplement: 1304127111_pnas.201304127SI.pdf [file 1304127111_pnas.201304127SI.pdf]

# Supporting Information

Polka et al. 10.1073/pnas.1304127111

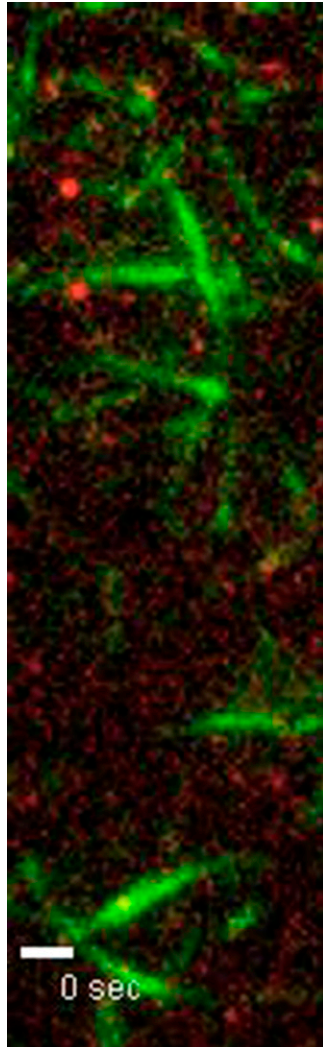

**Movie S1.** DNA-bound AlfA filaments are more dynamic than unbound filaments: 6 nM *parN*, 3  $\mu$ M AlfA, 1.5  $\mu$ M AlfB. (Scale bar, 1  $\mu$ m.) Acquisition interval, 5 s.

[Movie S1](#)

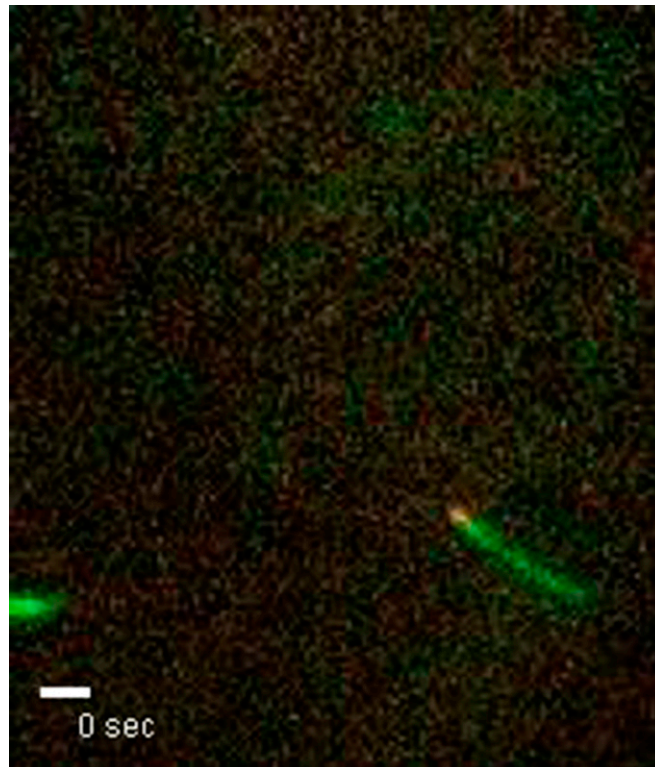

**Movie S2.** Multivalent *parV* particles can be propelled processively. Source for Fig. 4C: 20 nM *parV*, 3  $\mu$ M AlfA, 1.5  $\mu$ M AlfB. (Scale bar, 1  $\mu$ m.) Acquisition interval, 5 s.

[Movie S2](#)

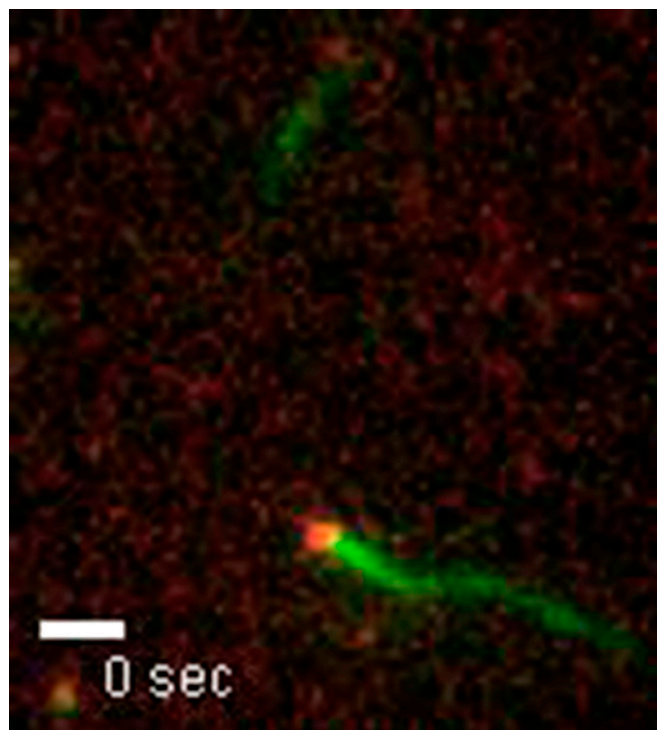

**Movie S3.** A *parN* particle breaks apart, with the daughters pushed in opposite directions. Source for Fig. 4D: 60 nM *parN*, 3.2  $\mu$ M AlfA, 1.6  $\mu$ M AlfB. (Scale bar, 1  $\mu$ m.) Acquisition interval, 3 s.

[Movie S3](#)

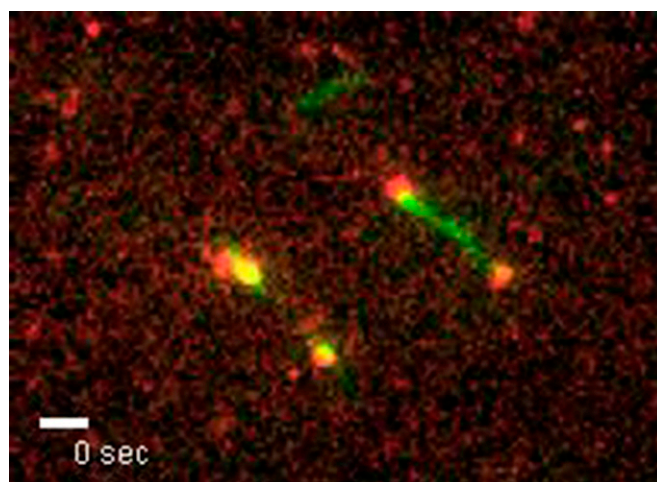

**Movie S4.** Multiple successive filament/DNA rearrangements and segregation events. Source for Fig. 4E: 60 nM *parN*, 3.2  $\mu$ M AlfA, 1.6  $\mu$ M AlfB. (Scale bar, 1  $\mu$ m.) Acquisition interval, 3 s.

[Movie S4](#)

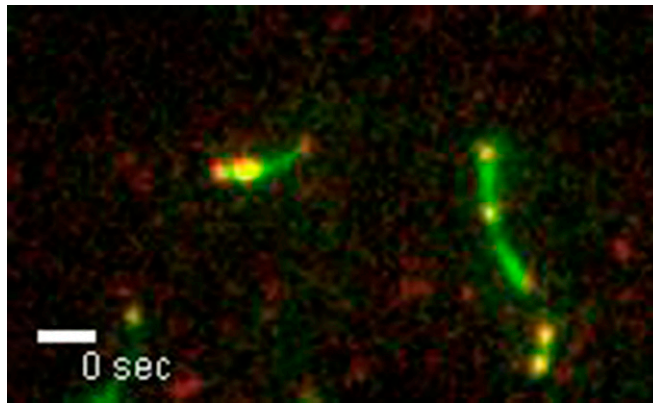

**Movie S5.** Multiple successive filament/DNA rearrangements and segregation events: 60 nM *parN*, 3.2 μM AlfA, 1.6 μM AlfB. (Scale bar, 1 μm.) Acquisition interval, 3 s.

[Movie S5](#)

## Other Supporting Information Files

[SI Appendix \(PDF\)](#)
